# Supplementary material for: The Caspase-3 homolog DrICE regulates endocytic trafficking during Drosophila tracheal morphogenesis
Source: PubMed Central journal article supplement (PMC6399233; doi:10.1038/s41467-019-09009-z), 2019-03-04
Supplement: 41467_2019_9009_MOESM1_ESM.pdf [file 41467_2019_9009_MOESM1_ESM.pdf]

## The Caspase-3 homolog DrICE regulates endocytic trafficking during *Drosophila* tracheal morphogenesis

Saoirse S. McSharry<sup>1</sup> and Greg J. Beitel<sup>1\*</sup>

Key words: caspase; non-apoptotic; endocytic trafficking; morphogenesis; epithelial tube; *Drosophila*; trachea

<sup>1</sup>Department of Molecular Biosciences, Northwestern University, Evanston, IL 60208, USA

Running title: Caspase-mediated regulation of endocytic trafficking

\* Author for correspondence and lead contact: Greg J. Beitel, Hogan Hall, Rm. 2-100, Northwestern University, Evanston, IL 60208, U.S.A., [beitel@northwestern.edu](mailto:beitel@northwestern.edu), Ph: (847) 467-7776, FAX: (847) 467-1380

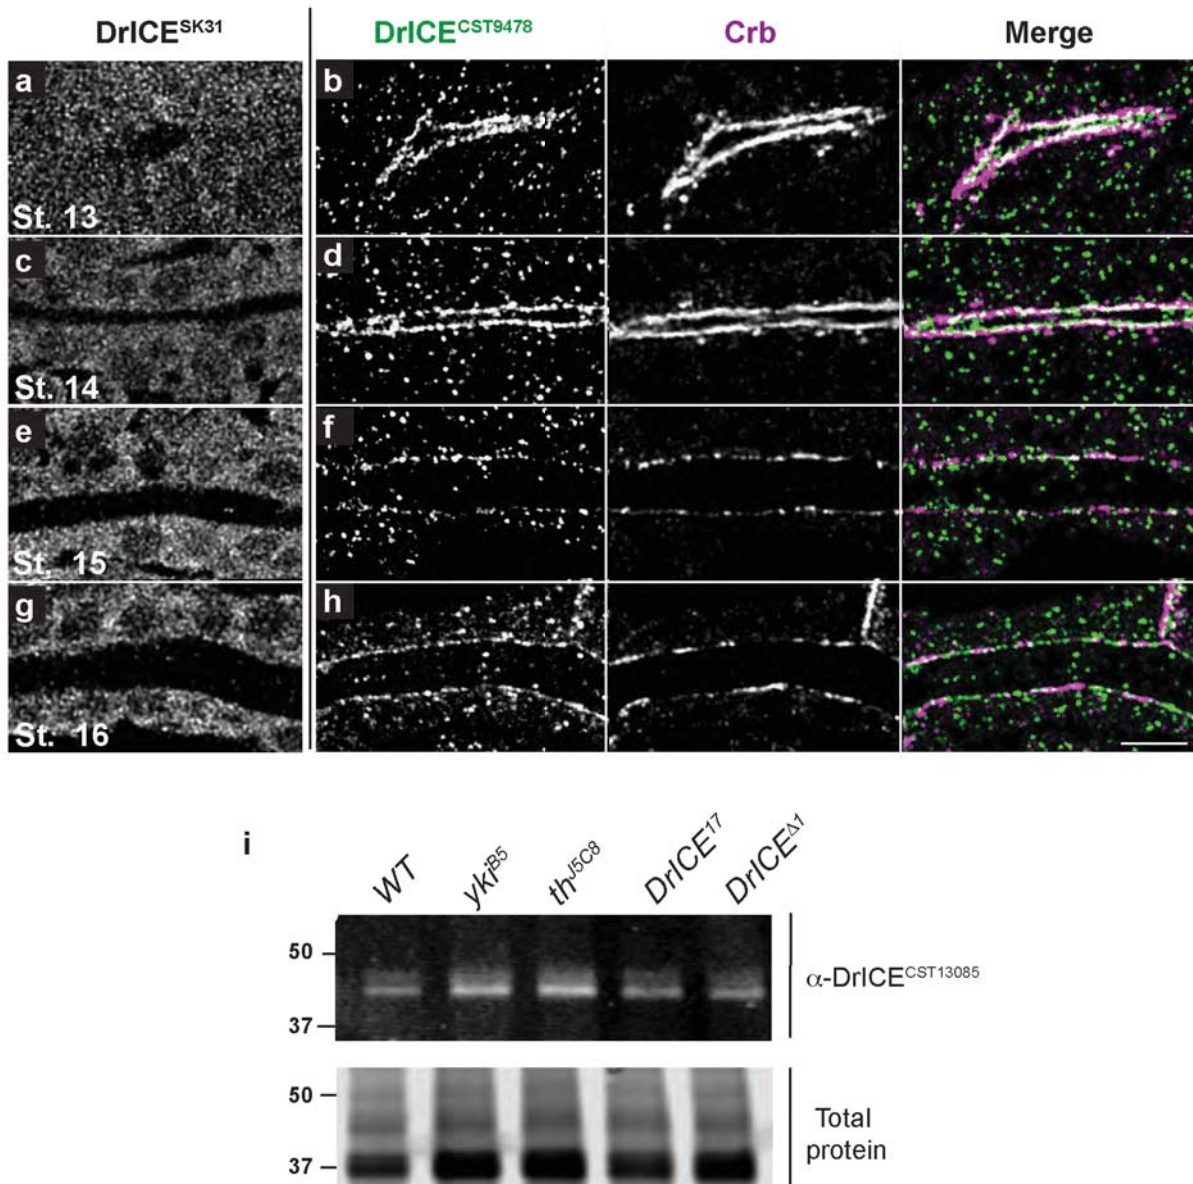

**Supplementary Fig. 1: Developmental profile of DrICE with Crumbs, and DrICE levels in *yorkie<sup>B5</sup>*.** (a-h) The  $\alpha$ -DrICE<sup>SK31</sup> antibody against full-length DrICE<sup>3</sup> (a,c,e,g) reveals broad cytoplasmic staining during stages 13-16 (St.13- St. 16). Staining with the  $\alpha$ -DrICE<sup>CST9478</sup> antibody that was raised against a peptide that is cleaved during DrICE activation (Cell Signaling Technologies #9478) reveals a more restricted punctate pattern that is enriched at the tracheal apical surface (b, d, f, h; green) where it overlaps with staining for the apical marker Crumbs (Crb, b, d, f, h; magenta), particularly during tube expansion at stages 13 and 14 (b,d). Scale bar for a-h" in h", 5  $\mu$ m.

(i) Western blot of stage 16 embryos using the  $\alpha$ -DrICE<sup>CST13085</sup> antibody that recognizes full-length DrICE (Cell Signaling Technologies #13085). *yki<sup>B5</sup>* and *th<sup>J5C8</sup>* mutations appear to increase DrICE protein levels, but based on quantification of the 47kDa DrICE full-length band relative to total protein from three experiments, only the *yki<sup>B5</sup>* difference is statistically significant (Fig. 1o). Note that DrICE protein levels in *DrICE<sup>17</sup>* homozygotes are not different than WT, which is consistent with *DrICE<sup>17</sup>* being a dominant negative allele that causes more severe tracheal phenotypes than the *DrICE<sup>Δ1</sup>* null allele.

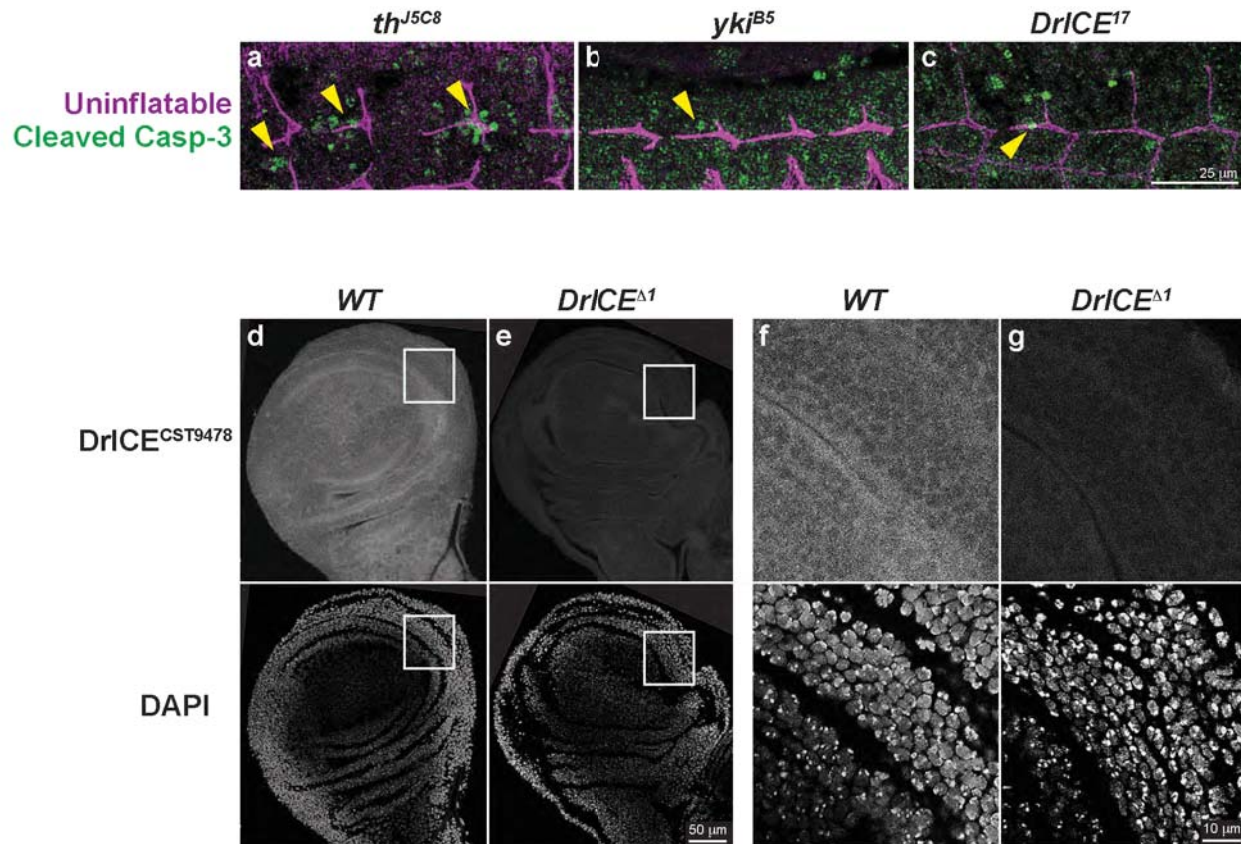

**Supplementary Fig. 2: Cleaved caspase staining in *Diap1/th* embryos and *DrICE<sup>Δ1</sup>* imaginal discs.** (a-c) Maximum projections of anti-cleaved caspase-3 staining, considered a marker of apoptotic cells,<sup>4</sup> shows that trachea of stage 13 *th<sup>J5C8</sup>* embryos have noticeably more cleaved caspase-3 staining than either (b) *yki<sup>B5</sup>* or (c) *DrICE<sup>17</sup>* embryos. As *th<sup>J5C8</sup>* embryos also have a decreased total number of tracheal cells (Fig. 1m), these data support the conclusion that missing in the dorsal trunk segments in *th<sup>J5C8</sup>* embryos (Fig. 1i) result from increased tracheal cell apoptosis. Scale bar for a-c in c, 25 μm.

(d-g) Staining WT (*w<sup>118</sup>*) late larval wing imaginal discs with *DrICE<sup>CST9478</sup>* (low magnification view in e; magnification of the boxed region is shown in f) reveals a pattern of subcellular localization similar to embryonic tracheal cells. (e, g) *DrICE<sup>CST9478</sup>* staining is absent in *DrICE<sup>Δ1</sup>* mutant wing discs, supporting the conclusion that the *DrICE<sup>CST9478</sup>* signal present in *DrICE<sup>Δ1</sup>* mutant embryos (Fig. 2h) results from maternal contribution of *DrICE*. Bottom row shows DAPI staining of tissue. Scale bar for d- in bottom of e, 50 μm; for f-g in bottom of g, 10 μm.

Supplementary Table 1: Resources used in experimental analysis

| REAGENT or RESOURCE                                                                      | SOURCE                                                                | IDENTIFIER |
|------------------------------------------------------------------------------------------|-----------------------------------------------------------------------|------------|
| <b>Antibodies</b>                                                                        |                                                                       |            |
| Guinea pig anti-uninflatable (1:800)                                                     | Rob Ward                                                              |            |
| $\alpha$ -DrICE <sup>CST9478</sup> Rabbit anti-cleaved Drosophila ICE Asp230 (1:100)     | Cell Signaling Technology (CST)                                       | 9478S      |
| $\alpha$ -DrICE <sup>CST13085S</sup> Rabbit anti-Drosophila ICE (1:100)                  | Cell Signaling Technology (CST)                                       | 13085S     |
| Mouse anti-Crumbs extracellular domain (1:25)                                            | Developmental Studies Hybridoma Bank (DSHB) at the University of Iowa | Cq4-s      |
| Mouse anti-2A12 (1:1)                                                                    |                                                                       |            |
| Rabbit anti-Serp (1:400)                                                                 |                                                                       |            |
| IRDye 800CW goat anti-Rabbit 0.5mg                                                       | Li-Cor                                                                | 926-32211  |
| Guinea-pig anti-DrICE (SK31)                                                             | Pascal Meier                                                          | SK31       |
| Rat anti-Clathrin (Chc) (1:40)                                                           | Matthias Behr                                                         | n/a        |
| Mouse anti-Rab5 (1:100)                                                                  | BD Biosciences                                                        | 610281     |
| Mouse anti-Rab7 (1:50)                                                                   | Developmental Studies Hybridoma Bank (DSHB) at the University of Iowa | Rab7       |
| Mouse anti-Rab11 (1:100)                                                                 | Fisher Scientific                                                     | BDB610656  |
| Guinea pig anti-Melanotransferrin                                                        | Christos Samakovilis                                                  | n/a        |
| Rabbit anti-Kune-Kune (1:500)                                                            | <sup>1</sup>                                                          |            |
| Rabbit anti-Dlg (1:500)                                                                  | Woods et al 1996 <sup>2</sup>                                         |            |
| Goat anti-mouse IgG (H+L) highly cross-adsorbed secondary antibody Alexa Fluor 488 Plus  | Life Technologies                                                     | A32723     |
| Goat anti-mouse IgM (H+L) highly cross-adsorbed secondary antibody Alexa Fluor 488       | Life Technologies                                                     | A10680     |
| Goat anti-rabbit IgG (H+L) highly cross-adsorbed secondary antibody Alexa Fluor Plus 647 | Life Technologies                                                     | A32733     |
| Goat anti-guinea pig IgG (H+L) highly cross-adsorbed secondary antibody Alexa Fluor 568  | Life Technologies                                                     | A11075     |
| IRDye 800CW Goat anti-Rabbit 0.5 mg                                                      | Li-Cor                                                                | 926-32211  |
| <b>Critical Commercial Assays</b>                                                        |                                                                       |            |
| REVERT Total protein stain kit                                                           | Fisher Scientific                                                     | NC1145693  |
| Pre-cast gel 4-15%, 15 well                                                              | Bio Rad                                                               | 4561086    |
| <b>Software and Algorithms</b>                                                           |                                                                       |            |
| Fiji (ImageJ) SpotCounter plugin                                                         |                                                                       |            |
| Volocity Demo 5.5.1                                                                      |                                                                       |            |
| Leica Application Suite X (LAS X) HyVolution and colocalization calculation              |                                                                       |            |
| Li-Cor Image Studio Software                                                             |                                                                       |            |

**References for Supplemental Figure Legends**

1. Nelson, K.S., Furuse, M. & Beitel, G.J. The Drosophila Claudin Kune-kune is required for septate junction organization and tracheal tube size control. *Genetics* **185**, 831-839 (2010).
2. Woods, D.F., Hough, C., Peel, D., Callaini, G. & Bryant, P.J. Dlg protein is required for junction structure, cell polarity, and proliferation control in Drosophila epithelia. *The Journal of cell biology* **134**, 1469-1482 (1996).
3. Ditzel, M. *et al.* Inactivation of effector caspases through nondegradative polyubiquitylation. *Molecular cell* **32**, 540-553 (2008).
4. Baer, M.M. *et al.* The role of apoptosis in shaping the tracheal system in the Drosophila embryo. *Mechanisms of development* **127**, 28-35 (2010).
